# Supplementary material for: Correlations of Online Search Engine Trends With Coronavirus Disease (COVID-19) Incidence: Infodemiology Study
Source: PubMed Central journal article supplement (PMC7244220; doi:10.2196/19702), 2020-05-21
Supplement: publichealth_v6i2e19702_app1.pdf [file publichealth_v6i2e19702_app1.pdf]

Appendix 1. Complete list of considered search terms

|                                                                                                                                                                                                                                                                                                                                                                                                                                                                                                                                                                                                                                                                                                                                                                 |                                                                                                                                                                                                                                                                                                                                                                                                                                                                                                                                                                                  |
|-----------------------------------------------------------------------------------------------------------------------------------------------------------------------------------------------------------------------------------------------------------------------------------------------------------------------------------------------------------------------------------------------------------------------------------------------------------------------------------------------------------------------------------------------------------------------------------------------------------------------------------------------------------------------------------------------------------------------------------------------------------------|----------------------------------------------------------------------------------------------------------------------------------------------------------------------------------------------------------------------------------------------------------------------------------------------------------------------------------------------------------------------------------------------------------------------------------------------------------------------------------------------------------------------------------------------------------------------------------|
| <p><b>COVID-19</b></p> <p>Coronavirus (Virus, search term)<br/>COVID-19 (search term)<br/>SARS-CoV-2 (search term)<br/>Severe acute respiratory syndrome (Disease)</p> <p><b>Upper Airway Symptoms</b></p> <p>Anosmia (Topic, search term)<br/>Ageusia (Topic, search term)<br/>Dizziness (Medical Condition, search term)<br/>Dysgeusia (Disease, Topic, search term)<br/>Nasal congestion (Syndrome, search term)<br/>Rhinorrhea (Medical Condition, search term)<br/>Sneeze (Topic, search term)<br/>Sneezing (search term)<br/>Sore throat (Topic, search term)</p> <p><b>Lower Airway Symptoms</b></p> <p>Cough (Disease, search term)<br/>Dyspnea (search term)<br/>Shortness of breath (Disease, Topic, search term)<br/>Sputum (Topic, search term)</p> | <p><b>Gastrointestinal Symptoms</b></p> <p>Abdominal pain (Syndrome, search term)<br/>Diarrhea (Topic, search term)<br/>Nausea (Disorder, search term)<br/>Vomiting (Ailment, search term)</p> <p><b>Systemic Symptoms</b></p> <p>Anorexia (Symptom, search term)<br/>Fatigue (Medical Condition, search term)<br/>Fever</p> <p><b>Embolitic Pain</b></p> <p>Chest pain (Syndrome, search term)<br/>Headache (Medical Condition, search term)<br/>Myalgia (Topic, search term)</p> <p><b>Other</b></p> <p>Eye pain (Topic, search term)<br/>Skin rash (Disease, search term)</p> |
|-----------------------------------------------------------------------------------------------------------------------------------------------------------------------------------------------------------------------------------------------------------------------------------------------------------------------------------------------------------------------------------------------------------------------------------------------------------------------------------------------------------------------------------------------------------------------------------------------------------------------------------------------------------------------------------------------------------------------------------------------------------------|----------------------------------------------------------------------------------------------------------------------------------------------------------------------------------------------------------------------------------------------------------------------------------------------------------------------------------------------------------------------------------------------------------------------------------------------------------------------------------------------------------------------------------------------------------------------------------|
